# Supplementary material
Source: PubMed Central journal article supplement (PMC7359735)
Supplement: NIHMS1545585-supplement-11.pdf [file NIHMS1545585-supplement-11.pdf]

**Table S4. Summary of Decidualization Efficiency of EPS-blastoids Transfer Experiments, Related to Figure 6**

| Experiment | Cell line          | Number of EPS-blastoid transferred | Number of Decidua | Decidua/EPS-blastoids (%) |
|------------|--------------------|------------------------------------|-------------------|---------------------------|
| 1st        | EPS_Td_1           | 40                                 | 2                 | 5                         |
| 2nd        | EPS_Td_2           | 40                                 | 3                 | 7.5                       |
| 3rd        | EPS_Td_1           | 20                                 | 1                 | 5                         |
| 4th        | EPS_Td_2           | 20                                 | 2                 | 10                        |
| 5th        | ES-converted EPS_1 | 20                                 | 1                 | 5                         |
| 6th        | ES-converted EPS_2 | 20                                 | 2                 | 10                        |
| 7th        | EPS_Td_2           | 20                                 | 2                 | 10                        |
| 8th        | EPS_Td_1           | 40                                 | 5                 | 12.5                      |
| 9th        | EPS_Td_2           | 40                                 | 2                 | 5                         |
| 10th       | EPS_Td_1           | 40                                 | 2                 | 5                         |
| Total      |                    | 300                                | 22                | 7.33                      |
