# Supplementary material
Source: PubMed Central journal article supplement (PMC7359735)
Supplement: NIHMS1545585-supplement-12.pdf [file NIHMS1545585-supplement-12.pdf]

**Table S5. Summary of the Efficiency of Recovered Embryo/Embryo-like Structures from Deciduae, Related to Figure 6**

| dpc | Control           |                   |                | EPS-blastoid-derived |                                  |                |
|-----|-------------------|-------------------|----------------|----------------------|----------------------------------|----------------|
|     | Number of decidua | Number of embryos | Percentage (%) | Number of decidua    | Number of embryo-like structures | Percentage (%) |
| 6.5 | 4                 | 2                 | 50             | 5                    | 2                                | 40             |
| 7.5 | 20                | 16                | 80             | 2                    | 1                                | 50             |
| 8.5 | 15                | 12                | 80             | 2                    | 1                                | 50             |
